# Supplementary material for: De novo gene signature identification from single‐cell RNA‐seq with hierarchical Poisson factorization
Source: PubMed Central journal article supplement (PMC6386217; doi:10.15252/msb.20188557), 2019-02-22
Supplement: MSB-15-e8557-s002.pdf [file MSB-15-e8557-s002.pdf]

## Expanded View Figures

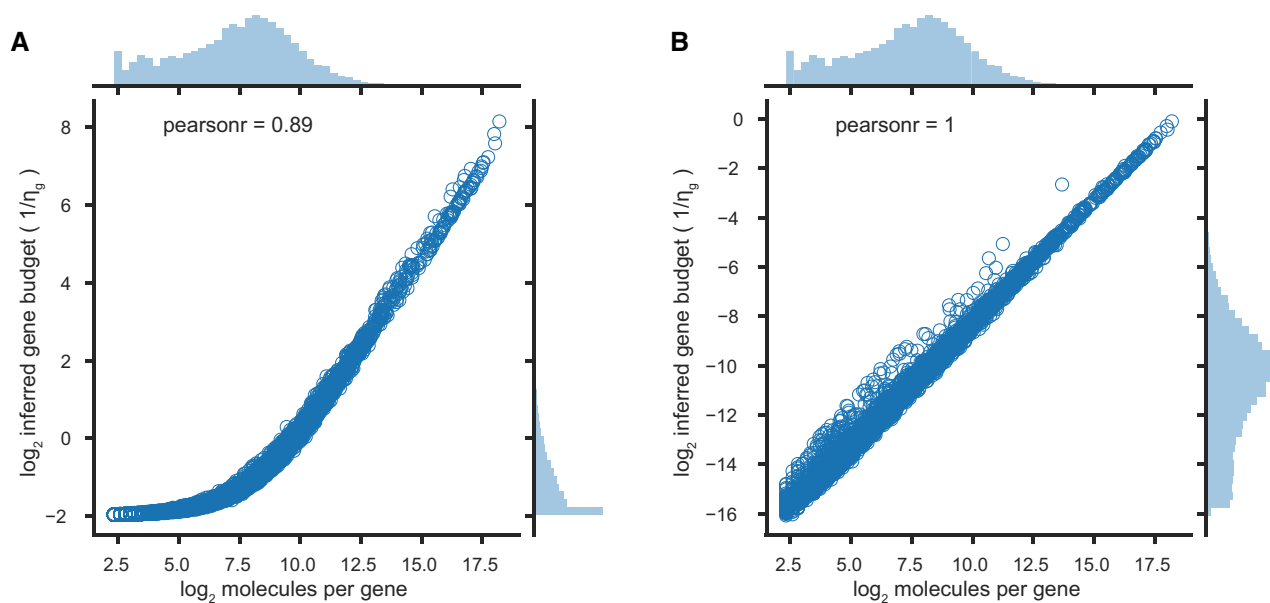

**Figure EV1. Effect of empirically set hyperparameters on inference of budgets.**

A, B Scatter plots of  $\log_2$  molecules per gene (x-axes) versus the  $\log_2$  inferred gene budgets (y-axes), with hyperparameters (A)  $a'$ ,  $b'$ ,  $c'$  and  $d'$  set to 1 or (B) determined empirically in a representative experiment on peripheral blood mononuclear cells. Histograms on top and right show the marginal probability distributions along each axis.

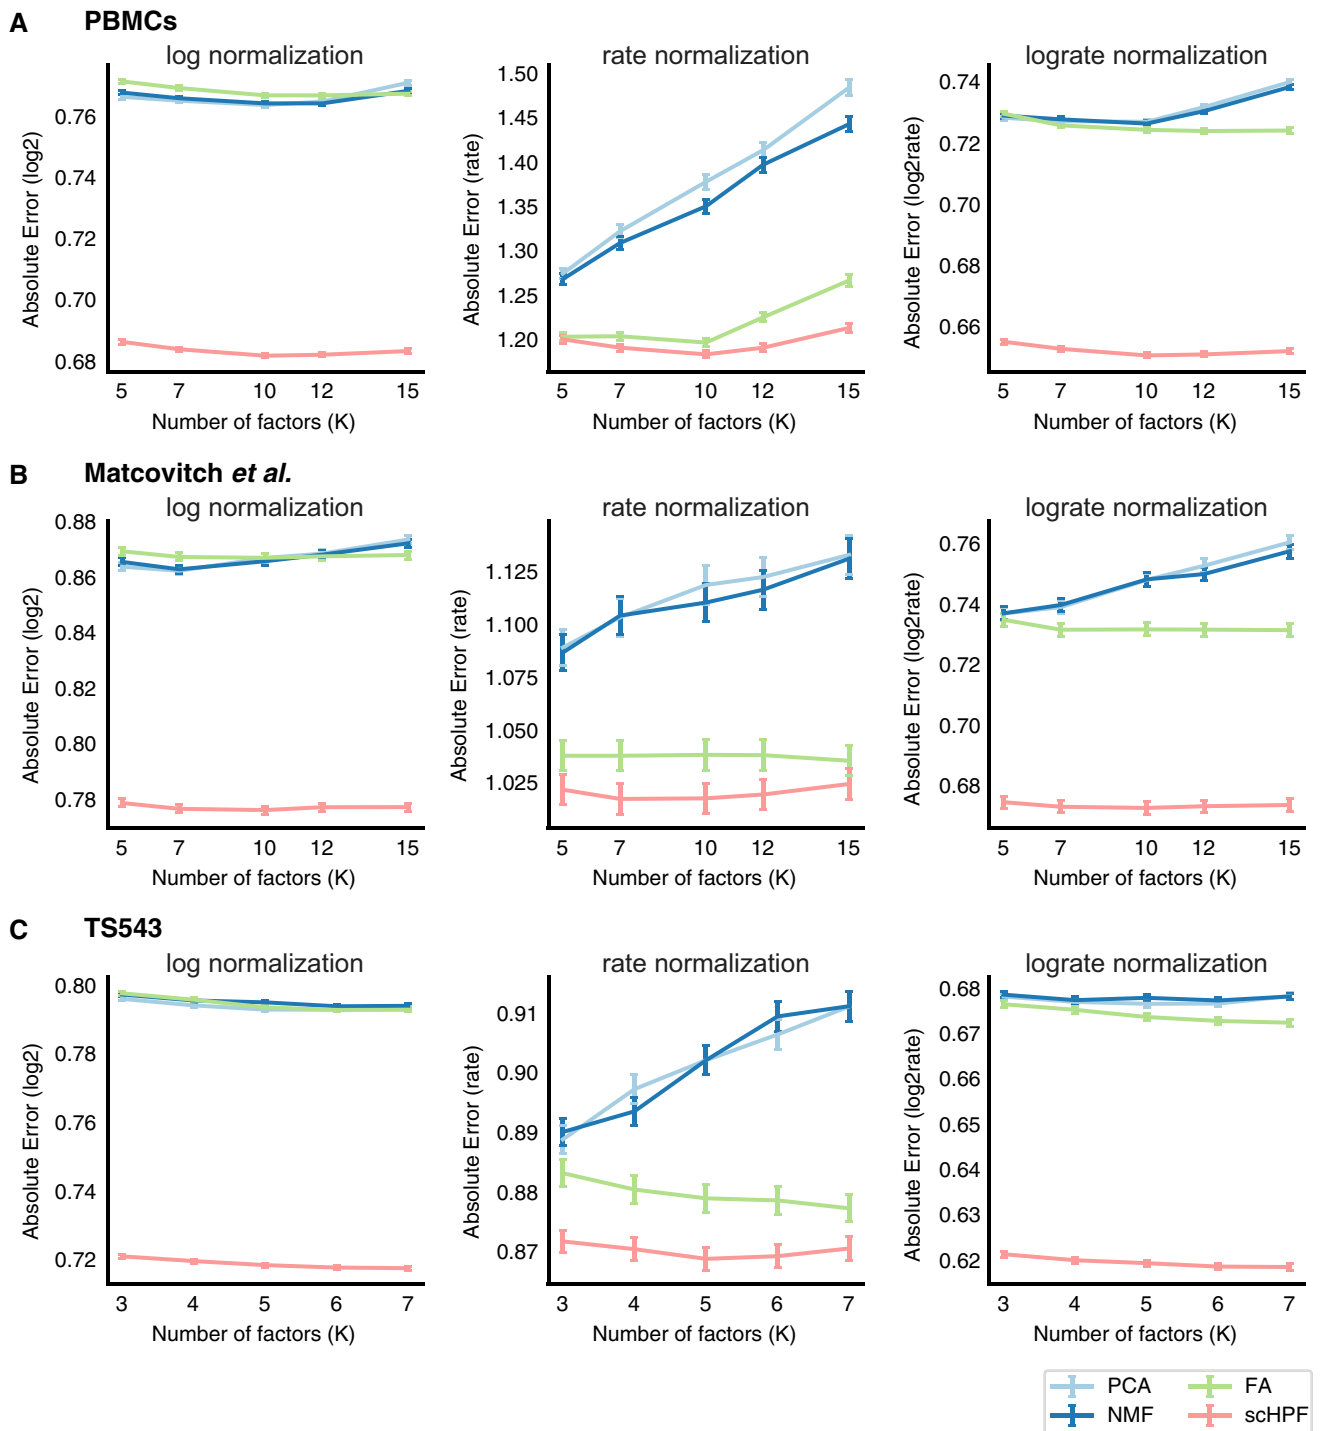

**Figure EV2. Predictive performance across different number of factors.**

A–C scHPF has lower test error than other method and normalization combinations on a withheld partition of the (A) PBMC, (B) Matcovitch *et al.*, and (C) TS543 datasets for several different numbers of factors. Error bars show standard error of the mean across all withheld values (4% of non-zero matrix entries randomly selected from each dataset: 220391 for PBMCs, 68895 for Matcovitch *et al.*, 356241 for TS543); center values show the mean. scHPF's predictions were normalized before calculating error.

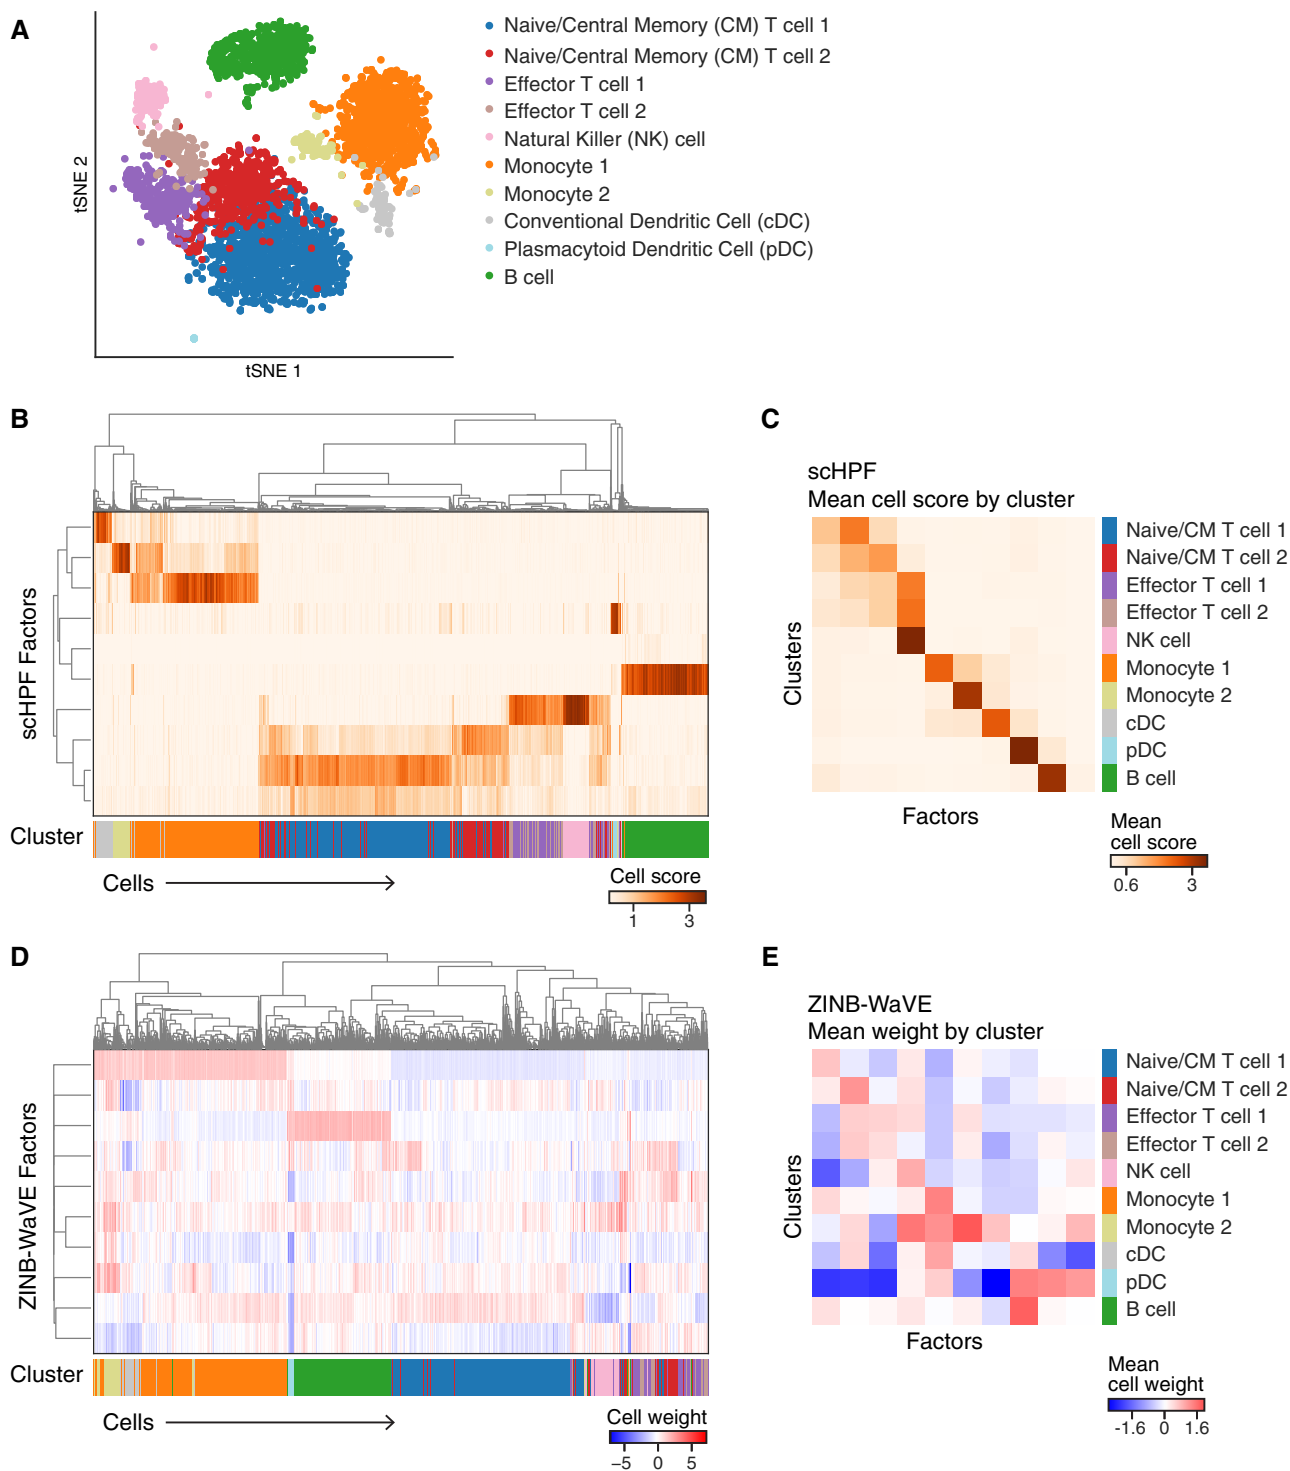

**Figure EV3. Cell-type associations of factors obtained with scHPF or ZINB-WaVE on the PBMC data.**

- A UMAP embedding of PBMCs, colored by cluster.
- B Main heatmap shows average-linkage hierarchical clustering of scHPF cell scores for each factor (rows) and cell (columns). Bottom colorbar shows cells' assigned cluster in (A).
- C scHPF factors' (columns) mean cell score for each cluster (row).
- D, E Same as (B, C), but for ZINB-WaVE cell weights.

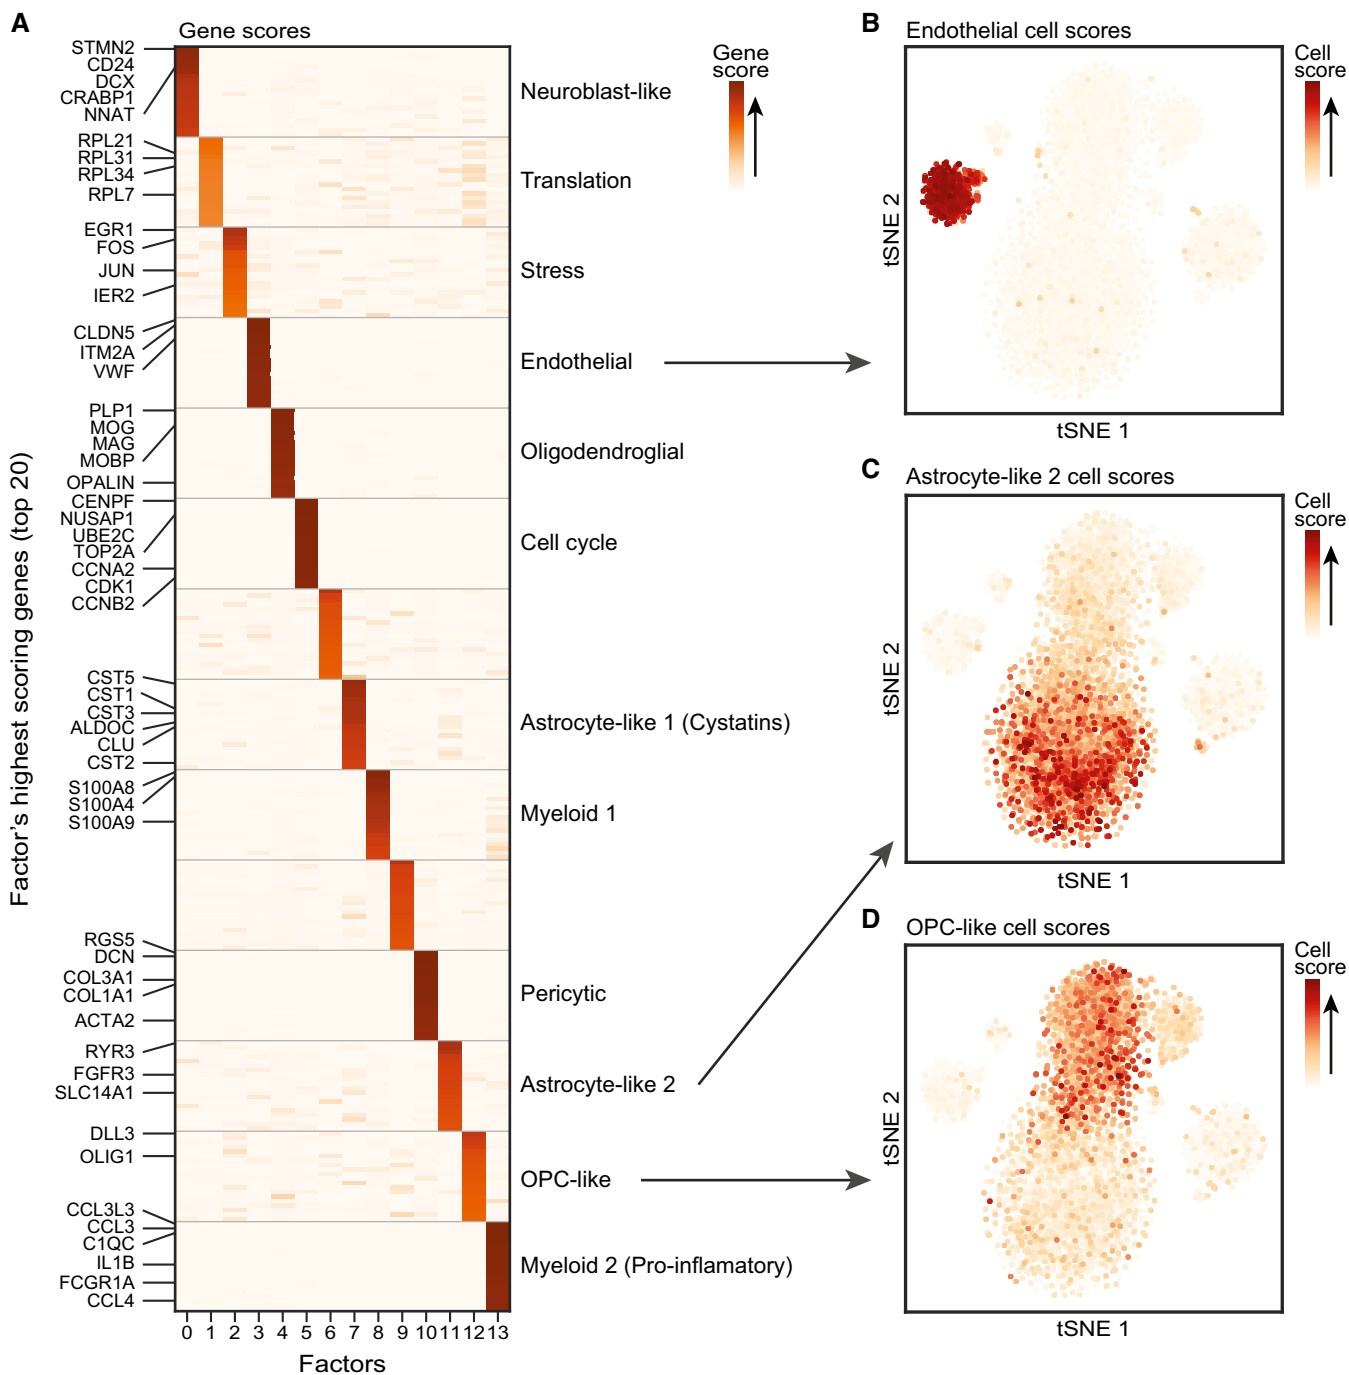

**Figure EV4. sCHPF discovers gene signatures in a high-grade glioma.**

A Heatmap of sCHPF gene scores for each factor (columns) and the top twenty genes per factor (rows). Canonical marker genes and genes from a protein superfamily are highlighted.

B–D tSNE of all cells colored by their sCHPF cell scores for a factor that marks a discrete population of endothelial cells (B), one of two glioma-associated factors that highly ranks astrocyte marker genes (C), and a glioma-associated factor that highly ranks OPC marker genes.

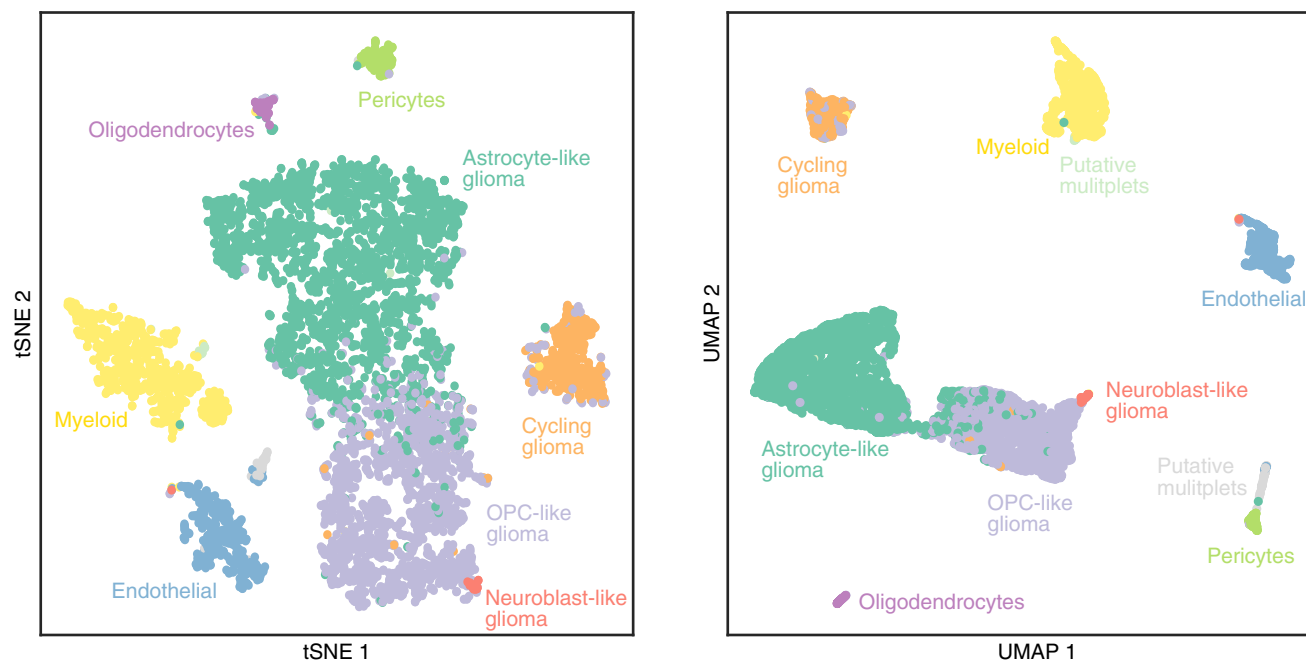

**Figure EV5.** scHPF cell scores can be used as a low-dimensional input to visualization algorithms.

tSNE (left) and UMAP (right) embeddings of HGG cells using scHPF cell scores as a low-dimensional input. Pearson's correlation distance was used as a distance metric.
